# Supplementary material for: Computational and infrared spectroscopic investigations ofN-substituted carbazoles
Source: Royal Society of Chemistry journal article supplement (doi:10.1039/d0cp03879b), 2021-01-01
Supplement: d0cp03879b1.pdf [file d0cp03879b1.pdf]

Supporting Information

**Computational and infrared spectroscopic investigations of**

***N*-substituted carbazoles**

Jonathan Y. Mane,<sup>\*a</sup> Kirk H. Michaelian,<sup>\*a</sup> Stanislav R. Stoyanov,<sup>\*a</sup> Brant E. Billingham<sup>b</sup> and  
Jianbao Zhao<sup>b</sup>

<sup>a</sup> Natural Resources Canada, CanmetENERGY Devon, 1 Oil Patch Drive, Devon, Alberta,  
CANADA T9G 1A8

<sup>b</sup> Canadian Light Source Inc., 44 Innovation Boulevard, Saskatoon, Saskatchewan, CANADA  
S7N 2V3

\*E-mail: [jonathan.mane@canada.ca](mailto:jonathan.mane@canada.ca) ; [kirk.michaelian@canada.ca](mailto:kirk.michaelian@canada.ca) ;  
[stanislav.stoyanov@canada.ca](mailto:stanislav.stoyanov@canada.ca)

**Table S1.** Calculated bond orders and bond lengths for N9-R at the DFT/ $\omega$ B97X-D/6-311++G(d,p) level of theory.

| Molecule          | R  | Bond Order | N9-R Bond Length, Å |
|-------------------|----|------------|---------------------|
| carbazole         | H  | 0.81       | 1.00                |
| 9-methylcarbazole | Me | 0.95       | 1.44                |
| 9-ethylcarbazole  | Et | 0.94       | 1.45                |
| 9-vinylcarbazole  | Vi | 1.01       | 1.40                |
| 9-phenylcarbazole | Ph | 0.96       | 1.42                |

**Table S2.** Experimental (exp) and calculated (calc) far-IR band positions (cm<sup>-1</sup>) for carbazole.

| exp <sup>b</sup>    | calc <sup>a</sup>                                     |                                                                                                                                         |                                                                                                                                                                                             |
|---------------------|-------------------------------------------------------|-----------------------------------------------------------------------------------------------------------------------------------------|---------------------------------------------------------------------------------------------------------------------------------------------------------------------------------------------|
|                     | monomer                                               | dimer I                                                                                                                                 | dimer II                                                                                                                                                                                    |
| 70 m                |                                                       | 59 (1.97) – Monomer rocking                                                                                                             | 55 (1.58), 78 (0.30) – Monomer rocking                                                                                                                                                      |
| 101 w               | 102 (5.54) – Aromatic ring bending (butterfly motion) | 100 (0.51) – Monomer rocking                                                                                                            | 106 (0.17) – Monomer rocking                                                                                                                                                                |
| 124 m               |                                                       | 116 (3.94) – Butterfly motion                                                                                                           | 117 (7.48) – Butterfly motion                                                                                                                                                               |
| 145 m               | 150 (0.00) – Out-of-plane ring twisting               | 152 (0.24) – Monomer out-of-plane ring twisting                                                                                         | 162 (0.45), 174 (0.23) – Bending of rings in one monomer, out-of-plane twisting of other monomer                                                                                            |
| 221 vw              | 222 (0.38) – In-plane ring rocking                    | 220 (0.37, 0.47) – Monomer in-plane ring rocking                                                                                        | 221 (0.40, 0.51) – Monomer in-plane ring rocking                                                                                                                                            |
| 311 vw              | 344 (61.81) – NH hydrogen out-of-plane wagging        | 322 (4.82) – Monomer out-of-plane ring bending                                                                                          | 313 (0.51), 322 (0.96) – Monomer out-of-plane ring bending<br><br>374 (125.93) – NH hydrogen out-of-plane wagging in one monomer                                                            |
| 426 <sup>c</sup> vs | 434 (11.28) – Out-of-plane ring bending               | 425 (163.18), 426 (36.70) – Monomer NH hydrogen out-of-plane wagging<br><br>430 (73.95), 433 (1.22) – Monomer out-of-plane ring bending | 434 (8.93) – Monomer out-of-plane ring bending<br><br>437 (0.94) – Out-of-plane ring bending of one monomer, ring breathing of other monomer<br><br>439 (1.72) – Monomer ring breathing, NH |

|                  |                                                       |                                                                                                                                      |                                                                                                                                                                 |
|------------------|-------------------------------------------------------|--------------------------------------------------------------------------------------------------------------------------------------|-----------------------------------------------------------------------------------------------------------------------------------------------------------------|
|                  |                                                       |                                                                                                                                      | hydrogen wagging in one monomer<br><br>440 (6.60) – Monomer out-of-plane ring bending                                                                           |
| 445° vs          | 438 (1.44) – In-plane stretching or ring breathing    | 442 (9.05, 59.13) – Monomer ring breathing and NH hydrogen wagging<br><br>452 (2.37), 455 (1.43) – Monomer out-of-plane ring bending | 454 (2.26) – Monomer out-of-plane ring bending<br><br>459 (99.76), 463 (39.52) – Out-of-plane ring bending of one monomer, NH hydrogen wagging in other monomer |
| 507 w            | 520 (4.77) – In-plane pyrrole ring stretching         | 520 (1.97), 521 (3.11) – Monomer in-plane pyrrole ring stretching                                                                    | 520 (0.44), 521 (5.01) – Monomer in-plane pyrrole ring stretching                                                                                               |
| 552 vw<br>566 vw | 569 (0.21) – In-plane benzene ring stretching         | 567 (0.31), 569 (0.71) – Monomer in-plane benzene ring stretching                                                                    | 569 (0.44, 0.51) – In-plane benzene ring stretching in one monomer                                                                                              |
| 573 s            | 583 (14.71) – Out-of-plane ring bending               | 583 (19.71) – Monomer out-of-plane ring bending                                                                                      | 585 (23.53) – Monomer out-of-plane ring bending                                                                                                                 |
| 600 vw           | 592 (0.00) – Out-of-plane ring bending                | 592 (0.68) – Monomer out-of-plane ring bending                                                                                       | 592 (0.75) – Out-of-plane ring bending of one monomer                                                                                                           |
| 619 vw           | 636 (6.10) – In-plane benzene ring stretching         | 635 (2.52, 3.82) – Monomer in-plane benzene ring stretching                                                                          | 635 (1.53), 636 (5.86) – Monomer in-plane benzene ring stretching                                                                                               |
| 656 vw           | 675 (0.49) – In-plane ring stretching                 | 678 (3.70), 679 (1.58) – Monomer in-plane ring stretching                                                                            | 677 (1.33), 678 (2.25) – In-plane ring stretching of one monomer                                                                                                |
| 717 m            | 749 (102.30) – Out-of-plane aromatic hydrogen wagging | 745 (192.66), 758 (2.59), 762 (5.45) – Monomer out-of-plane aromatic hydrogen wagging                                                | 746 (152.20), 750 (26.41), 761 (2.95) – Monomer out-of-plane aromatic hydrogen wagging                                                                          |

|       |                                                                   |                                                                                                           |                                                                                                                                                      |
|-------|-------------------------------------------------------------------|-----------------------------------------------------------------------------------------------------------|------------------------------------------------------------------------------------------------------------------------------------------------------|
|       |                                                                   |                                                                                                           | 766 (2.86) – Monomer ring breathing<br><br>767 (2.68, 3.86) – Ring breathing in one monomer, out-of-plane aromatic hydrogen wagging in other monomer |
| 742 m | 776 (65.00) – Out-of-plane aromatic hydrogen wagging              | 766 (19.24) – Monomer ring breathing<br><br>776 (139.72) – Monomer out-of-plane aromatic hydrogen wagging | 776 (137.54), 779 (15.75) – Monomer out-of-plane aromatic hydrogen wagging                                                                           |
| 759 m |                                                                   | 791 (1.29) – Monomer out-of-plane ring bending                                                            | 793 (1.41) – Out-of-plane ring bending in one monomer                                                                                                |
| 774 w | 795 (0.00) – Out-of-plane aromatic hydrogen wagging, ring bending | 796 (1.11) – Monomer out-of-plane ring bending                                                            | 797 (4.91) – Out-of-plane ring bending in one monomer                                                                                                |

<sup>a</sup> Intensities in (km/mol)

<sup>b</sup> vs = very strong; s = strong; m = medium; w = weak; vw = very weak

<sup>c</sup> broad, overlapping

**Table S3.** Experimental (exp) and calculated (calc) far-IR band positions (cm<sup>-1</sup>) for 9-methylcarbazole.

| exp <sup>b</sup>   | 9-methylcarbazole , calc <sup>a</sup>                 |                                                                                                                                                                                |                                                                                                           |
|--------------------|-------------------------------------------------------|--------------------------------------------------------------------------------------------------------------------------------------------------------------------------------|-----------------------------------------------------------------------------------------------------------|
|                    | monomer                                               | dimer I                                                                                                                                                                        | dimer II                                                                                                  |
| 66 vw              |                                                       |                                                                                                                                                                                | 67 (0.02) – Monomer rocking                                                                               |
| 80 vw              |                                                       | 79 (0.24) – Monomer rocking                                                                                                                                                    | 79 (0.07) – Monomer rocking                                                                               |
| 100 vw             | 105 (4.64) – Aromatic ring bending (butterfly motion) | 115 (6.91) – Butterfly motion                                                                                                                                                  | 106 (0.29) – Butterfly motion in one monomer, methyl rotation in other monomer                            |
| 129 s              | 111 (0.12) – Butterfly motion                         | 141 (0.75) – Butterfly motion in one monomer, methyl rotation in other monomer<br><br>150 (0.41) – Out-of-plane ring twisting in one monomer, methyl rotation in other monomer | 112 (1.60) – Monomer butterfly motion                                                                     |
| 163 <sup>c</sup> m |                                                       | 161 (1.07) – Out-of-plane ring twisting and methyl wagging in one monomer<br><br>166 (0.46) – Monomer out-of-plane ring twisting                                               | 157 (0.89), 164 (0.42) – Monomer out-of-plane ring twisting                                               |
| 175 <sup>c</sup> m |                                                       | 192 (3.12) – Monomer methyl wagging                                                                                                                                            | 170 (5.51), 177 (5.82) – Out-of-plane ring twisting in one monomer, methyl wagging in other monomer       |
| 223 w              | 223 (0.19) – In-plane ring rocking                    | 222 (0.17), 223 (0.14) – Monomer in-plane ring rocking                                                                                                                         | 214 (0.77) – Methyl rotation in one monomer<br><br>222 (0.23), 223 (0.15) – Monomer in-plane ring rocking |

|        |                                                        |                                                                                          |                                                                                                                     |
|--------|--------------------------------------------------------|------------------------------------------------------------------------------------------|---------------------------------------------------------------------------------------------------------------------|
| 306 vw | 294 (0.33), 297 (0.10) – In-plane methyl wagging       | 297 (0.11), 302 (0.24), 306 (0.21) – Monomer out-of-plane ring bending                   | 303 (0.23) – In-plane methyl wagging in one monomer<br>309 (0.22) – Monomer out-of-plane ring bending               |
| 311 vw | 307 (0.20) – Out-of-plane ring bending                 | 316 (0.28) – Monomer out-of-plane ring bending                                           | 313 (0.56) – Monomer out-of-plane ring bending<br>320 (0.25) – In-plane methyl wagging in one monomer               |
| 423 s  | 434 (5.92) – Out-of-plane ring bending, ring breathing | 435 (0.46, 12.56) – Monomer out-of-plane ring bending                                    | 432 (13.48), 436 (1.17) – Monomer out-of-plane ring bending                                                         |
| 440 vw | 440 (1.94) – Out-of-plane ring bending, ring breathing | 440 (3.02), 441 (0.91) – Monomer ring breathing                                          | 440 (0.90), 441 (2.26) – Monomer ring breathing                                                                     |
| 474 vw | 454 (0.01) – Out-of-plane ring bending                 | 455 (0.28), 456 (0.11) – Monomer out-of-plane ring bending                               | 454 (0.42), 460 (0.52) – Monomer out-of-plane ring bending                                                          |
| 530 m  | 541 (4.29) – In-plane pyrrole ring stretching          | 541 (3.35, 3.70) – In-plane pyrrole ring stretching in one monomer                       | 541 (1.88), 542 (4.64) – In-plane pyrrole ring stretching in one monomer                                            |
| 562 s  | 575 (8.24), 582 (5.78) – Out-of-plane ring bending     | 576 (3.21, 8.18), 582 (6.11), 583 (2.11), 593 (0.47) – Monomer out-of-plane ring bending | 576 (6.36), 577 (6.13) – Out-of-plane ring bending in one monomer<br>582 (7.02) – Monomer out-of-plane ring bending |
| 593 vw | 614 (0.02) – In-plane benzene ring stretching          | 614 (0.06) – Monomer in-plane benzene ring stretching                                    | 614 (0.05) – Monomer in-plane benzene ring stretching                                                               |
| 615 m  | 636 (4.69) – In-plane benzene ring stretching          | 635 (2.78, 2.86) – In-plane benzene ring stretching in one monomer                       | 634 (0.71), 635 (4.72) – Monomer in-plane benzene ring stretching                                                   |
| 721 vs | 746 (11.68, 67.89) – Out-of-plane                      | 742 (153.30), 744 (4.90) – Monomer out-of-plane                                          | 741 (140.19), 745 (16.69) –                                                                                         |

|        |                                                                    |                                                                                                                                                                                                                                        |                                                                                                                                                                                                                                        |
|--------|--------------------------------------------------------------------|----------------------------------------------------------------------------------------------------------------------------------------------------------------------------------------------------------------------------------------|----------------------------------------------------------------------------------------------------------------------------------------------------------------------------------------------------------------------------------------|
|        | aromatic hydrogen wagging                                          | aromatic hydrogen wagging<br><br>746 (7.62) – Monomer ring breathing<br><br>758 (1.00), 761 (3.61) – Monomer out-of-plane aromatic hydrogen wagging                                                                                    | Monomer out-of-plane aromatic hydrogen wagging                                                                                                                                                                                         |
| 745 vs | 775 (82.83) – Out-of-plane aromatic hydrogen wagging, ring bending | 773 (171.06), 775 (2.83) – Monomer out-of-plane aromatic hydrogen wagging                                                                                                                                                              | 763 (5.88), 775 (174.06), 778 (2.66) – Monomer out-of-plane aromatic hydrogen wagging                                                                                                                                                  |
| 771 m  | 794 (1.12) – In-plane ring stretching, N9-methyl C stretching      | 792 (0.30) – Monomer out-of-plane aromatic hydrogen wagging, monomer ring bending<br><br>794 (0.24, 1.21), 795 (0.67) – In-plane ring stretching and N9-methyl C stretching in one monomer, out-of-plane ring bending in other monomer | 792 (2.35) – Monomer out-of-plane aromatic hydrogen wagging, monomer ring bending<br><br>794 (1.10, 2.16), 795 (0.65) – In-plane ring stretching and N9-methyl C stretching in one monomer, out-of-plane ring bending in other monomer |

<sup>a</sup> Intensities in (km/mol)

<sup>b</sup> vs = very strong; s = strong; m = medium; w = weak; vw = very weak

<sup>c</sup> broad, overlapping

**Table S4.** Experimental (exp) and calculated (calc) far-IR band positions (cm<sup>-1</sup>) for 9-ethylcarbazole.

| exp <sup>b</sup> | 9-ethylcarbazole, calc. <sup>a</sup>                  |                                                                                                                                                                                                                                                                                                                           |                                                                                                                                                                                                                                               |
|------------------|-------------------------------------------------------|---------------------------------------------------------------------------------------------------------------------------------------------------------------------------------------------------------------------------------------------------------------------------------------------------------------------------|-----------------------------------------------------------------------------------------------------------------------------------------------------------------------------------------------------------------------------------------------|
|                  | monomer                                               | dimer I                                                                                                                                                                                                                                                                                                                   | dimer II                                                                                                                                                                                                                                      |
| 109 w            | 108 (1.16) – Aromatic ring bending (butterfly motion) | 74 (2.72), 79 (1.10) – Ethyl bending with rings in one monomer<br><br>86 (0.50) – Monomer rocking                                                                                                                                                                                                                         | 92 (1.20) – Ethyl bending with monomer aromatic rings                                                                                                                                                                                         |
| 131 m            |                                                       | 130 (1.06) – Butterfly motion                                                                                                                                                                                                                                                                                             | 117 (3.78) – Butterfly motion                                                                                                                                                                                                                 |
| 216 w            | 214 (0.39) – In-plane ring rocking                    | 211 (0.25), 213 (0.23) – In-plane ring rocking and ethyl CH <sub>3</sub> rotation in one monomer<br><br>215 (0.43) – Monomer in-plane ring rocking and ethyl CH <sub>3</sub> rotation<br><br>216 (0.21) – In-plane ring rocking and ethyl CH <sub>3</sub> rotation in one monomer, in-plane ring rocking in other monomer | 217 (0.17, 0.64) – In-plane ring rocking and ethyl CH <sub>3</sub> rotation in one monomer, in-plane ring rocking in other monomer<br><br>219 (0.22, 0.40) – In-plane aromatic ring rocking and ethyl CH <sub>3</sub> rotation in one monomer |
| 269 m            | 265 (1.51) – Ethyl rocking, out-of-plane ring bending | 270 (2.00) – Monomer ethyl rocking and out-of-plane ring bending                                                                                                                                                                                                                                                          | 273 (2.69) – Monomer ethyl rocking and out-of-plane aromatic ring bending in both monomers                                                                                                                                                    |
| 410 m            | 412 (2.82) – Ethyl bending, out-of-plane ring bending | 413 (8.79), 416 (1.89) – Monomer ethyl bending and out-of-plane ring bending                                                                                                                                                                                                                                              | 416 (8.84) – Monomer ethyl bending and out-of-plane ring bending                                                                                                                                                                              |
| 424 m            | 434 (6.14) – Out-of-plane ring bending                | 436 (6.47), 437 (4.19) – Out-of-plane ring bending in one monomer                                                                                                                                                                                                                                                         | 434 (12.86), 438 (0.25) – Monomer out-of-plane ring bending                                                                                                                                                                                   |



|        |                                                                            |                                                                                                                               |                                                                                                                                                |
|--------|----------------------------------------------------------------------------|-------------------------------------------------------------------------------------------------------------------------------|------------------------------------------------------------------------------------------------------------------------------------------------|
| 435 w  | 445 (1.67) – Ethyl bending, ring breathing                                 | 446 (1.62, 2.29) – Ethyl bending, ring breathing in one monomer                                                               | 447 (3.46), 449 (0.27) – Monomer ethyl bending and ring breathing                                                                              |
| 449 vw | 453 (0.04) – Out-of-plane ring bending                                     | 457 (0.25), 459 (0.29) – Out-of-plane ring bending in one monomer                                                             | 456 (0.41), 462 (0.32) – Monomer out-of-plane ring bending                                                                                     |
| 529 m  | 541 (4.26) – In-plane pyrrole ring stretching                              | 541 (3.14, 3.83) – Monomer in-plane pyrrole ring stretching                                                                   | 541 (1.22, 5.17) – Monomer in-plane pyrrole ring stretching                                                                                    |
| 561 s  | 575 (6.11) – Ethyl rocking, out-of-plane ring bending                      | 575 (5.02), 576 (3.32) – Ethyl rocking, out-of-plane aromatic ring bending in one monomer                                     | 575 (0.44, 7.05) – Monomer ethyl rocking and out-of-plane ring bending                                                                         |
| 578 s  | 595 (4.89) – Ethyl bending/scissoring, out-of-plane ring bending           | 597 (0.57), 598 (3.87) – Monomer ethyl bending/scissoring and out-of-plane ring bending                                       | 592 (0.20, 0.43) – Out-of-plane ring bending in one monomer<br><br>597 (5.01) – Monomer ethyl bending/scissoring and out-of-plane ring bending |
| 616 m  | 636 (4.20) – In-plane ring stretching                                      | 634 (2.70), 635 (2.38) – In-plane ring stretching in one monomer                                                              | 634 (0.53), 635 (4.30) – Monomer in-plane ring stretching                                                                                      |
| 725 vs | 746 (76.82) – Aromatic hydrogen wagging                                    | 744 (143.44), 746 (27.07) – Monomer aromatic hydrogen wagging                                                                 | 745 (141.90), 748 (6.80) – Monomer aromatic hydrogen wagging                                                                                   |
| 754 vs | 776 (82.25) – Aromatic hydrogen wagging                                    | 760 (2.07), 774 (154.60), 775 (8.00) – Monomer aromatic hydrogen wagging                                                      | 763 (4.91), 775 (180.56), 778 (0.75) – Monomer aromatic hydrogen wagging                                                                       |
| 784 m  | 788 (0.42) – In-plane ring stretching, N9-ethyl C and ethyl C-C stretching | 788 (1.67) – Monomer in-plane ring stretching and N9-ethyl C stretching<br><br>788 (4.85) – Monomer in-plane ring stretching, | 787 (0.64) – Monomer in-plane ring stretching and N9-ethyl C stretching<br><br>794 (4.06) – Out-of-plane ring bending, aromatic                |

|  |                                                                   |                                                                                                                                                                                                                                    |                                                                                                                                                                                           |
|--|-------------------------------------------------------------------|------------------------------------------------------------------------------------------------------------------------------------------------------------------------------------------------------------------------------------|-------------------------------------------------------------------------------------------------------------------------------------------------------------------------------------------|
|  | 792 (6.92) – Ethyl hydrogen rocking                               | ethyl hydrogen rocking in one monomer                                                                                                                                                                                              | hydrogen wagging in one monomer, ethyl hydrogen rocking in other monomer                                                                                                                  |
|  | 797 (0.33) – Out-of-plane ring bending, aromatic hydrogen wagging | 795 (1.60) – Monomer out-of-plane ring bending and aromatic hydrogen wagging<br><br>796 (3.21), 798 (2.74) – Out-of-plane aromatic ring bending, aromatic hydrogen wagging in both monomers, ethyl hydrogen rocking in one monomer | 796 (3.17) – Monomer out-of-plane ring bending and aromatic hydrogen wagging, ethyl hydrogen rocking in one monomer<br><br>804 (2.71), 812 (6.24) – Ethyl hydrogen rocking in one monomer |

<sup>a</sup> Intensities in (km/mol)

<sup>b</sup> vs = very strong; s = strong; m = medium; w = weak; vw = very weak

<sup>c</sup> broad, overlapping

**Table S5.** Experimental (exp) and calculated (calc) far-IR band positions (cm<sup>-1</sup>) for 9-vinylcarbazole.

| exp <sup>b</sup> | 9-vinylcarbazole, calc. <sup>a</sup>                                                                       |                                                                                                                                                                                                |                                                                                                                                                                                                                                                                                                                                                  |
|------------------|------------------------------------------------------------------------------------------------------------|------------------------------------------------------------------------------------------------------------------------------------------------------------------------------------------------|--------------------------------------------------------------------------------------------------------------------------------------------------------------------------------------------------------------------------------------------------------------------------------------------------------------------------------------------------|
|                  | monomer                                                                                                    | dimer I                                                                                                                                                                                        | dimer II                                                                                                                                                                                                                                                                                                                                         |
| 71 m             | 76 (0.67) – Vinyl and carbazole aromatic ring scissoring                                                   | 76 (0.30), 80 (0.31), 84 (1.50) – Monomer rocking                                                                                                                                              | 59 (1.10) – Monomer rocking                                                                                                                                                                                                                                                                                                                      |
| 136 s            | 106 (2.21) – Aromatic ring bending (butterfly motion)<br><br>128 (5.39) – Vinyl rotation, butterfly motion | 110 (0.38) – Monomer rocking, vinyl and carbazole ring scissoring in one monomer<br><br>118 (4.00) – Monomer butterfly motion                                                                  | 110 (1.32), 122 (3.54) – Butterfly motion in one monomer, vinyl and carbazole ring scissoring in other monomer<br><br>130 (1.04) – Butterfly motion), vinyl rotation in one monomer, vinyl and carbazole ring scissoring in other monomer<br><br>139 (0.93) – Butterfly motion, vinyl rotation in one monomer, butterfly motion in other monomer |
| 168 w            | 153 (2.98) – Vinyl rotation, out-of-plane ring twisting                                                    | 161 (0.73) – Monomer out-of-plane ring twisting<br><br>173 (1.09) – Monomer out-of-plane ring twisting and vinyl rotation<br><br>186 (3.84) – Monomer in-plane ring rocking and vinyl rotation | 153 (5.80) – Monomer butterfly motion and vinyl rotation<br><br>175 (0.55) – Monomer out-of-plane ring twisting and vinyl rotation                                                                                                                                                                                                               |
| 224 w            | 204 (1.49) – Vinyl wagging                                                                                 | 212 (0.67), 216 (1.96) – Vinyl wagging in one monomer                                                                                                                                          | 211 (0.39), 214 (0.79) – Vinyl wagging in one monomer                                                                                                                                                                                                                                                                                            |

|        |                                                                                          |                                                                                                                                                                                                        |                                                                                                                                |
|--------|------------------------------------------------------------------------------------------|--------------------------------------------------------------------------------------------------------------------------------------------------------------------------------------------------------|--------------------------------------------------------------------------------------------------------------------------------|
|        | 228 (0.24) – Vinyl rotation, in-plane ring rocking                                       | 232 (0.25), 241 (2.61) – Vinyl, aromatic ring wagging in one monomer                                                                                                                                   |                                                                                                                                |
| 300 vw | 296 (0.74) – Out-of-plane benzene ring bending                                           | 297 (0.86), 304 (0.19) – Monomer out-of-plane benzene ring bending                                                                                                                                     | 300 (1.31), 306 (0.27) – Monomer out-of-plane benzene ring bending                                                             |
| 318 m  | 314 (1.07) – Out-of-plane ring bending                                                   | 325 (1.80) – Monomer out-of-plane ring bending                                                                                                                                                         | 322 (0.61), 328 (0.38) – Monomer out-of-plane ring bending                                                                     |
| 422 vw | 434 (6.05) – Out-of-plane ring bending<br><br>439 (0.98) – Vinyl bending, ring breathing | 407 (0.59), 411 (0.62) – Vinyl bending, in-plane ring stretching in one monomer                                                                                                                        | 435 (13.00, 1.47) – Monomer out-of-plane ring bending<br><br>439 (0.75), 440 (1.24) – Monomer vinyl bending and ring breathing |
| 430 vs | 458 (1.65) – Out-of-plane ring bending                                                   | 431 (12.46), 435 (0.40) – Monomer out-of-plane ring bending<br><br>438 (1.29), 439 (0.32) – Monomer vinyl bending and ring breathing<br><br>456 (2.78), 459 (0.52) – Monomer out-of-plane ring bending | 457 (1.88), 460 (0.98) – Monomer out-of-plane ring bending                                                                     |
| 529 s  | 540 (3.08) – In-plane pyrrole ring stretching                                            | 540 (1.80, 2.94) – In-plane pyrrole ring stretching in one monomer                                                                                                                                     | 540 (1.44, 3.11) – In-plane pyrrole ring stretching in one monomer                                                             |
| 546 s  | 561 (12.53) – Vinyl bending/scissoring, in-plane ring stretching                         | 560 (0.38), 562 (17.92) – Monomer vinyl bending/scissoring, in-plane ring stretching                                                                                                                   | 560 (5.27), 561 (12.92) – Monomer vinyl bending/scissoring, in-plane ring stretching                                           |
| 564 s  | 577 (3.69) – Out-of-plane ring bending                                                   | 576 (7.40) – Monomer out-of-plane ring bending                                                                                                                                                         | 577 (7.19) – Monomer out-of-plane ring bending                                                                                 |

|        |                                                                                                             |                                                                                                                                                                           |                                                                                             |
|--------|-------------------------------------------------------------------------------------------------------------|---------------------------------------------------------------------------------------------------------------------------------------------------------------------------|---------------------------------------------------------------------------------------------|
| 576 vw | –                                                                                                           | 578 (0.47) – Monomer out-of-plane ring bending                                                                                                                            | –                                                                                           |
| 615 s  | 635 (3.48) – In-plane ring stretching                                                                       | 634 (4.51) – Monomer in-plane ring stretching                                                                                                                             | 634 (3.99) – Monomer in-plane ring stretching                                               |
| 646 s  | 656 (3.46) – Vinyl scissoring, in-plane ring stretching                                                     | 658 (0.95), 659 (4.82) – Monomer vinyl scissoring and in-plane ring stretching                                                                                            | 658 (3.10), 660 (2.10) – Monomer vinyl scissoring and in-plane ring stretching              |
| 685 w  | 716 (9.75) – Vinyl wagging, in-plane ring stretching                                                        | 715 (2.84), 719 (9.72) – Monomer vinyl wagging and in-plane ring stretching                                                                                               | 712 (7.12), 713 (6.17) – Monomer vinyl wagging and in-plane ring stretching                 |
| 724 vs | 743 (2.28) – N9-vinyl C stretching, ring breathing<br><br>751 (85.17) – Vinyl and aromatic hydrogen wagging | 742 (29.46), 743 (21.98) – N9-vinyl C stretching and aromatic ring breathing in one monomer<br><br>747 (148.12), 749 (0.30) – Monomer vinyl and aromatic hydrogen wagging | 746 (80.04), 748 (11.14) – Monomer vinyl and aromatic hydrogen wagging                      |
| 750 vs | 764 (2.94), 779 (74.01) – Aromatic hydrogen wagging                                                         | 756 (7.08), 762 (5.85) – Monomer aromatic hydrogen wagging<br><br>773 (124.66), 776 (8.57) – Monomer aromatic hydrogen wagging and out-of-plane ring bending              | 777 (130.87), 779 (12.86) – Monomer aromatic hydrogen wagging and out-of-plane ring bending |

<sup>a</sup> Intensities in (km/mol)

<sup>b</sup> vs = very strong; s = strong; m = medium; w = weak; vw = very weak; sh = shoulder

**Table S6.** Experimental (exp) and calculated (calc) far-IR band positions (cm<sup>-1</sup>) for 9-phenylcarbazole.

| exp <sup>b</sup> | 9-phenylcarbazole, calc. <sup>a</sup>                                   |                                                                                 |                                                                                 |
|------------------|-------------------------------------------------------------------------|---------------------------------------------------------------------------------|---------------------------------------------------------------------------------|
|                  | monomer                                                                 | dimer I                                                                         | dimer II                                                                        |
| 62 w             | 75 (0.21) – Phenyl and carbazole ring scissoring                        | 71 (0.70) – Monomer carbazole ring bending and phenyl wagging                   | 62 (1.30) – Monomer phenyl and carbazole ring scissoring                        |
| 129 vw           | 110 (1.26) – Carbazole ring bending (butterfly motion)                  | 122 (0.30) – Monomer phenyl rotation about N9-phenyl C bond                     | 114 (3.13) – Monomer butterfly motion                                           |
| 139 w            | 151 (0.32) – Out-of-plane aromatic ring twisting about N9-phenyl C bond | 129 (2.77) – Monomer butterfly motion                                           |                                                                                 |
| 167 vw           |                                                                         | 166 (0.98) – Monomer out-of-plane aromatic ring twisting about N9-phenyl C bond | 160 (0.99) – Monomer out-of-plane aromatic ring twisting about N9-phenyl C bond |
| 196 vw           | 197 (0.11) – In-plane carbazole ring rocking                            | 202 (0.02, 0.04) – Monomer in-plane carbazole ring rocking                      | 203 (0.14) – Monomer in-plane carbazole ring rocking                            |
| 243 m            | 241 (0.67) – Out-of-plane carbazole and phenyl ring bending             | 249 (0.94) – Monomer out-of-plane carbazole and phenyl ring bending             | 245 (0.75) – Monomers out-of-plane carbazole and phenyl ring bending            |
| 252 m            |                                                                         | 257 (0.18) – Monomer out-of-plane carbazole and phenyl ring bending             | 249 (0.45) – Monomer out-of-plane carbazole and phenyl ring bending             |
| 263 w            | 264 (0.68) – Out-of-plane carbazole and phenyl ring bending             | 270 (0.80) – Monomers out-of-plane carbazole and phenyl ring bending            | 273 (0.30, 0.22) – Monomer out-of-plane carbazole and phenyl ring bending       |
| 293w             | 293 (0.64) – Out-of-plane carbazole benzene rings bending               | 300 (0.22), 301 (1.19) – Monomer out-of-plane carbazole benzene rings bending   | 295 (0.97), 301 (0.51) – Monomer out-of-plane carbazole benzene rings bending   |

|                  |                                                                                                                                  |                                                                                                                                                  |                                                                                                                                                  |
|------------------|----------------------------------------------------------------------------------------------------------------------------------|--------------------------------------------------------------------------------------------------------------------------------------------------|--------------------------------------------------------------------------------------------------------------------------------------------------|
| 323 s            | 330 (1.30) – Phenyl ring breathing, carbazole benzene rings rocking                                                              | 330 (2.63) – Monomer phenyl ring breathing, carbazole benzene rings rocking                                                                      | 331 (3.58) – Monomer phenyl ring breathing, carbazole benzene rings rocking                                                                      |
| 401 vw           | 412 (0.65) – Out-of-plane carbazole rings and phenyl ring bending                                                                | 401 (1.04) – Monomer out-of-plane carbazole rings and phenyl ring bending                                                                        | 407 (3.51) – Monomer out-of-plane carbazole rings and phenyl ring bending                                                                        |
| 418 vw,<br>421 s | 424 (1.10) – Phenyl ring bending                                                                                                 | 425 (3.20) – Monomer phenyl ring bending                                                                                                         | 426 (2.60) – Monomer phenyl ring bending                                                                                                         |
| 434 vw           | 437 (5.48) – Out-of-plane carbazole ring bending<br><br>445 (2.79) – Out-of-plane carbazole rings bending, phenyl ring breathing | 437 (11.24) – Monomer out-of-plane carbazole rings bending                                                                                       | 440 (14.06) – Monomer out-of-plane carbazole rings bending                                                                                       |
| 444 s            | 457 (2.76) – Out-of-plane carbazole rings bending                                                                                | 445 (1.02, 6.15) – Monomer out-of-plane carbazole rings bending<br><br>463 (2.47) – Monomer out-of-plane carbazole rings and phenyl ring bending | 445 (3.51) – Monomer out-of-plane carbazole rings bending<br><br>460 (4.70, 0.89) – Monomer out-of-plane carbazole rings and phenyl ring bending |
| 489 m            | 508 (4.92) – Phenyl ring bending                                                                                                 | 511 (8.82) – Monomers phenyl ring bending                                                                                                        | 511 (4.88), 512 (2.52) – Monomers phenyl ring bending                                                                                            |
| 531 m            | 542 (6.13) – In-plane carbazole rings stretching                                                                                 | 541 (9.80) – Monomer in-plane carbazole rings stretching                                                                                         | 542 (0.56, 8.33) – Monomer in-plane carbazole rings stretching                                                                                   |
| 568 m            | 585 (6.21) – Phenyl ring stretching, out-of-                                                                                     | 583 (13.45) – Monomer phenyl ring stretching and out-of-plane carbazole rings bending                                                            | 586 (1.76, 13.44), 590 (0.89) – Monomer phenyl ring stretching and out-of-                                                                       |

|        | plane carbazole rings bending                                                                                                                                                     |                                                                                                          | plane carbazole rings bending                                                                                            |
|--------|-----------------------------------------------------------------------------------------------------------------------------------------------------------------------------------|----------------------------------------------------------------------------------------------------------|--------------------------------------------------------------------------------------------------------------------------|
| 617 w  | 633 (0.52) – Phenyl ring bending, in-plane carbazole benzene rings stretching<br><br>636 (3.80) – Phenyl ring stretching and bending, in-plane carbazole benzene rings stretching | 635 (8.34) – Monomer in-plane phenyl ring and carbazole benzene rings stretching                         | 635 (6.47, 3.54) – Monomer in-plane phenyl ring and carbazole benzene rings stretching                                   |
| 628 m  | 649 (7.63) – Phenyl ring stretching and bending, in-plane carbazole benzene rings stretching                                                                                      | 649 (8.79) – Monomer phenyl ring stretching and bending, and in-plane carbazole benzene rings stretching | 649 (0.78), 650 (7.89) – Monomer phenyl ring stretching and bending, and in-plane carbazole benzene rings stretching     |
| 637 m  | 656 (10.04) – In-plane phenyl and carbazole rings stretching                                                                                                                      | 654 (13.83) – Monomer in-plane phenyl and carbazole rings stretching                                     | 655 (13.53) – Monomer in-plane phenyl and carbazole rings stretching                                                     |
| 698 m  | 722 (48.23) – Out-of-plane phenyl ring bending                                                                                                                                    | 722 (127.14) – Monomer out-of-plane phenyl ring bending                                                  | 721 (79.60), 722 (37.00) – Monomer out-of-plane phenyl ring bending<br><br>739 (5.63) – Monomer aromatic rings breathing |
| 725 m  | 751 (60.81) – Carbazole ring hydrogens wagging                                                                                                                                    | 750 (108.25) – Monomer carbazole ring hydrogens wagging                                                  | 745 (109.70), 747 (1.02) – Monomer carbazole ring hydrogens wagging                                                      |
| 747 sh | 763 (0.40) – Carbazole ring hydrogens wagging                                                                                                                                     | 757 (2.49), 760 (14.31) – Monomer carbazole ring hydrogens wagging                                       | 758 (3.13), 763 (4.96) – Monomer carbazole ring hydrogens wagging                                                        |



|        |                                                                                                                   |                                                                                                                |                                                                                                                                                                                              |
|--------|-------------------------------------------------------------------------------------------------------------------|----------------------------------------------------------------------------------------------------------------|----------------------------------------------------------------------------------------------------------------------------------------------------------------------------------------------|
| 753 m  | 776 (72.34) – Carbazole rings bending, hydrogens wagging<br><br>782 (0.30) – Phenyl and carbazole rings breathing | 771 (126.23), 774 (4.46) – Monomer carbazole rings bending, hydrogens wagging                                  | 774 (133.82) – Monomer carbazole rings bending, hydrogens wagging                                                                                                                            |
| 762 sh | 789 (35.93) – Phenyl hydrogens wagging<br><br>801 (0.69) – Carbazole rings bending                                | 781 (6.43) – Monomer phenyl and carbazole rings breathing<br><br>785 (86.15) – Monomer phenyl hydrogen wagging | 782 (1.14) – Monomer phenyl and carbazole rings breathing<br><br>787 (21.33, 71.93) – Monomer phenyl hydrogens wagging<br><br>796 (2.26, 6.24) – Monomer out-of-plane carbazole ring bending |

<sup>a</sup> Intensities in (km/mol)

<sup>b</sup> vs = very strong; s = strong; m = medium; w = weak; vw = very weak; sh = shoulder
